# Supplementary material for: Impact of Nocardia Infection on Airway Microbiota in Lung Transplant Recipients: A Single-center, Retrospective Observational Study
Source: Research Square preprint supplement (doi:10.21203/rs.3.rs-6947454/v1), 2025-08-21
Supplement: Supplementary file 1 [file 80251fa93f741a9f9514f397.docx]

**Supplementary Table 1 The average relative abundance of the top 20 genera**

| ID | Control | EG | TG |
| --- | --- | --- | --- |
| Burkholderia | 0.169946258260363 | 0.0946361920645836 | 0.0745322248302416 |
| Pseudomonas | 0.0147004655811016 | 0.0834303994737418 | 0.20520156898909 |
| family_Anelloviridae | 0.122422930825746 | 0.0822640213333626 | 0.0920022609668721 |
| Paraburkholderia | 0.140381362411137 | 0.0911543994631764 | 0.0634094296345405 |
| class_Caudoviricetes | 0.047127726147122 | 0.0268974118531833 | 0.0505178138829564 |
| Nocardia | 2.9016510001605e-05 | 0.111269345462513 | 0.000461835729073326 |
| Prevotella | 0.028705450135267 | 0.0371517077024586 | 0.0188169699059993 |
| Rothia | 0.0419553678834217 | 0.0177831988551788 | 0.015390474066964 |
| Acinetobacter | 0.000554891850095872 | 0.00487951522604088 | 0.0590587609344175 |
| Flavobacterium | 0.026388427737696 | 0.0164583363693328 | 0.0196209539981845 |
| Actinomyces | 0.019516245662681 | 0.0157850013724405 | 0.0203475468955255 |
| Streptococcus | 0.0216709776723266 | 0.0204322587349456 | 0.0112859365213645 |
| Haemophilus | 0.0356603402468742 | 0.00886346922950121 | 0.00846813346549526 |
| Veillonella | 0.00929663345569481 | 0.0278996853842168 | 0.00903655179796818 |
| Lautropia | 0.0160940667086239 | 0.0217310623306664 | 0.00527094302607772 |
| Schaalia | 0.00572754951110863 | 0.0280833792314616 | 0.00613291312620573 |
| Mastadenovirus | 0.000347530564643634 | 0.0378323990225672 | 0 |
| Chivirus | 0.000306516230536307 | 0.000277777777777778 | 0.0358871317687391 |
| Neisseria | 0.0158464682686157 | 0.00519604880123961 | 0.0124689370109775 |
| Capnocytophaga | 0.012010279969147 | 0.00713601215786918 | 0.0143314379833482 |
